# Supplementary material for: Spiral frameworks constructed by 1,2-phenylene-dioxydiacetic acid as highly sensitive and selective luminescent probes to detect PO43− ions in aqueous solutions
Source: Royal Society of Chemistry journal article supplement (doi:10.1039/c6ra13361d), 2016-01-01
Supplement: c6ra13361d1.pdf [file c6ra13361d1.pdf]

# Spiral frameworks firstly constructed by 1,2-phenylene-dioxydiacetic acid as highly sensitive and selective luminescent probes to detect PO<sub>4</sub><sup>3-</sup> ions in aqueous solutions

Enjun Gao\*, Na Sun, Yang Zhan, Xue Qiu, Yuqing Ding, Shaozhong Zhang, Mingchang Zhu\*

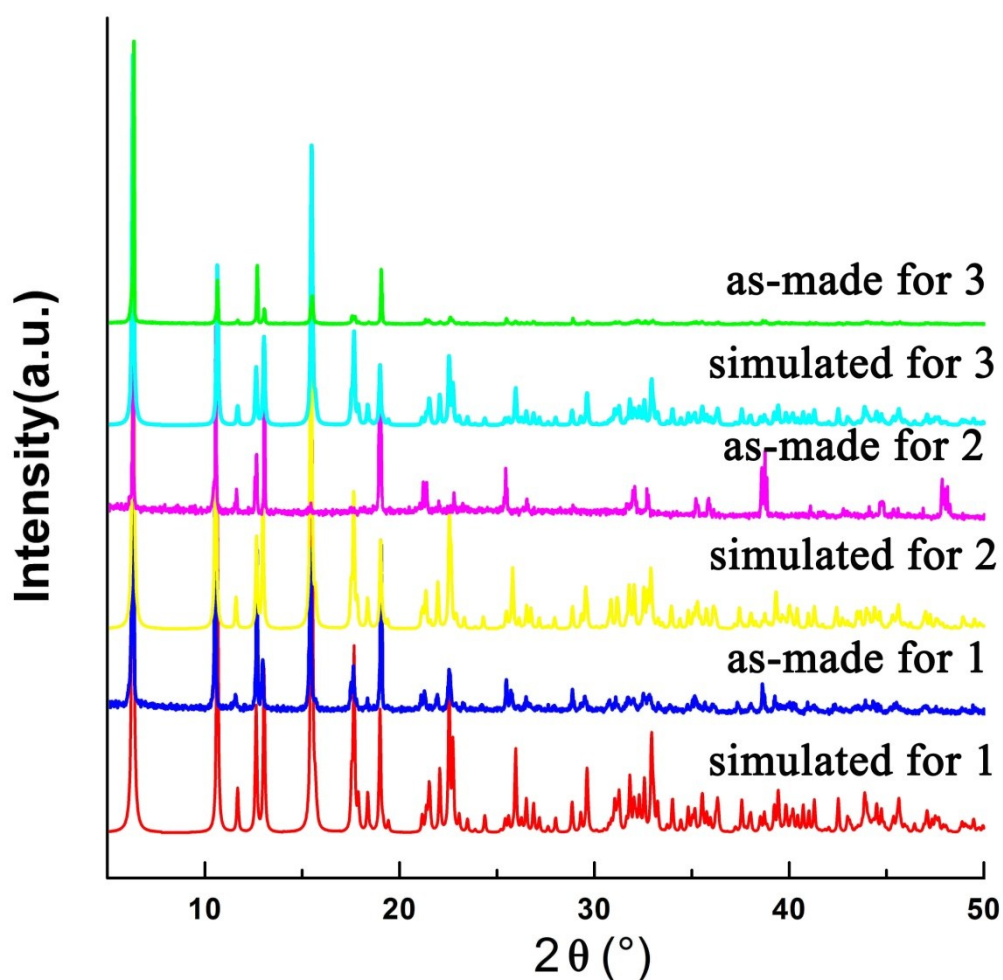

Fig.S1. Experimental and simulated powder PXRD patterns of 1–3.

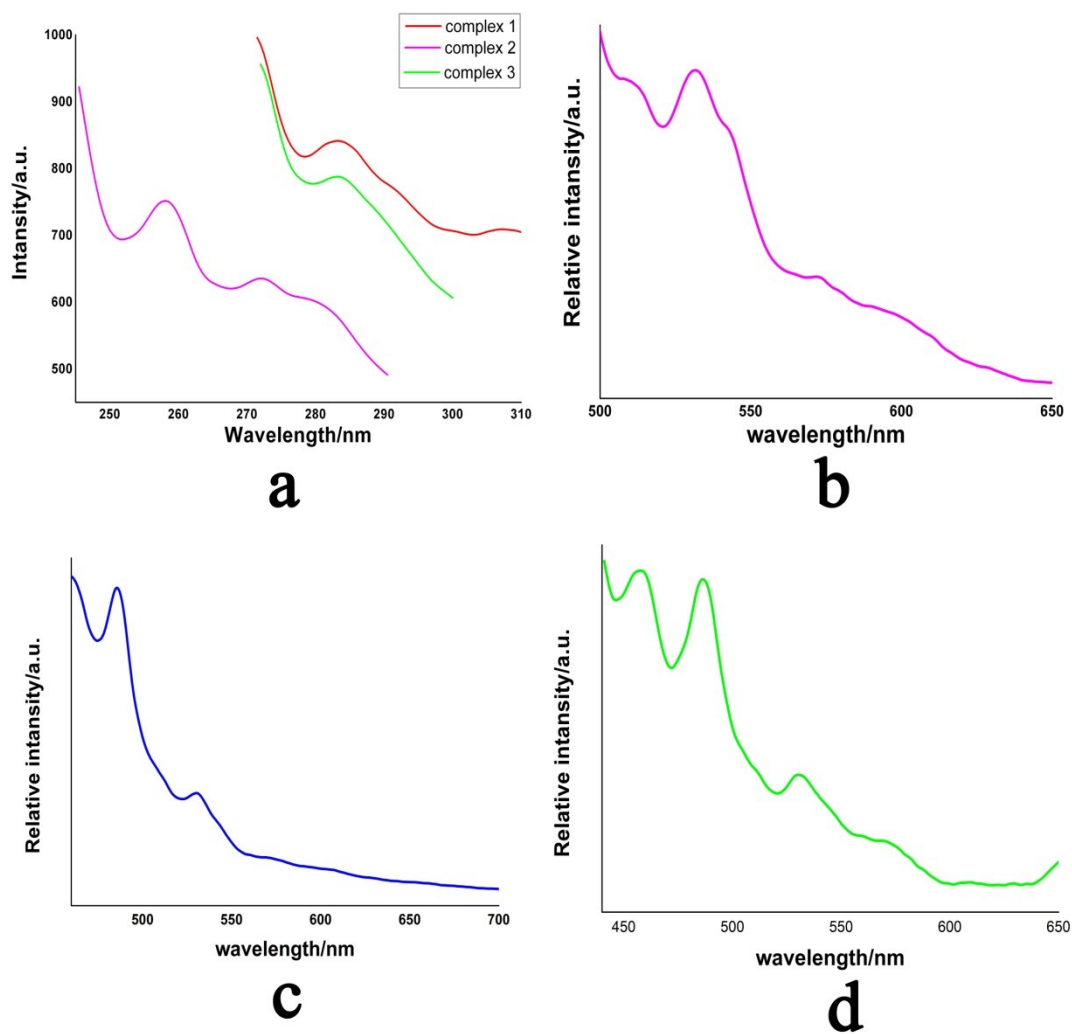

Fig.S2. a: the luminescent excitation spectrum of complex 1, 2 and 3; b and c: The luminescent emission spectrum of complex 1 and 2 excited at 301 nm; d: The luminescent emission spectrum of complex 3 excited at 413 nm.

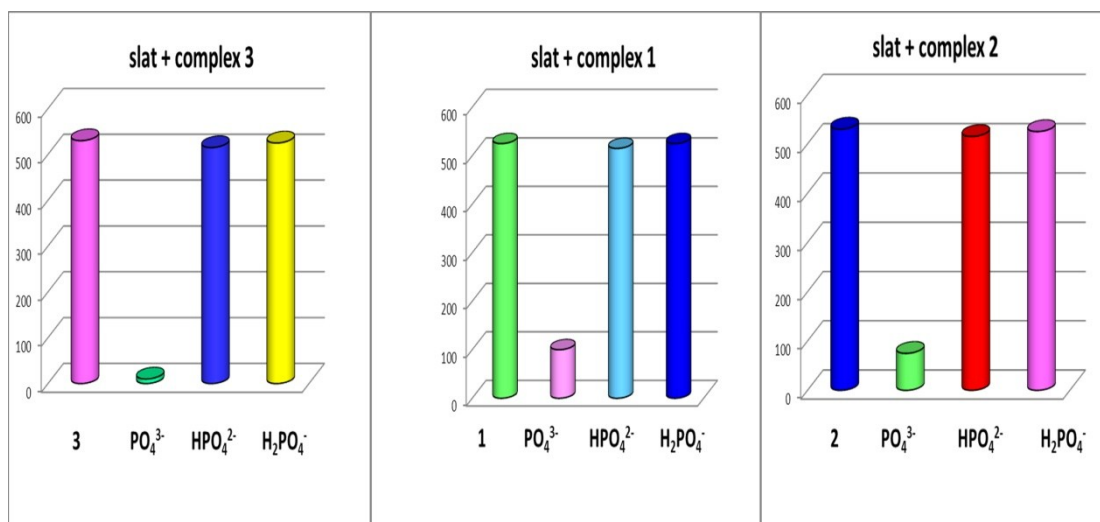

Fig.S3. Complexes comparison of the luminescence intensity of N-X in  $10^{-3}\text{M}$   $\text{H}_2\text{PO}_4^-$  and  $\text{HPO}_4^{2-}$  anions

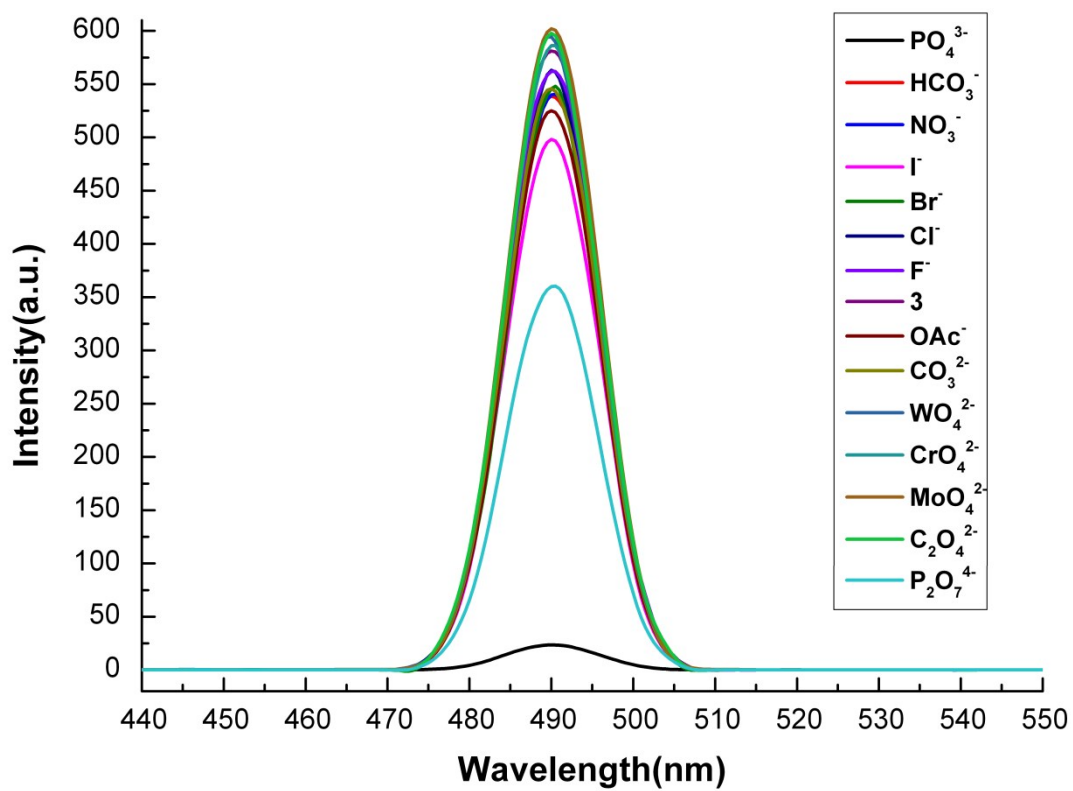

Fig.S4. Comparison of the luminescence intensity of 3-X in  $10^{-3}$  M different anions.

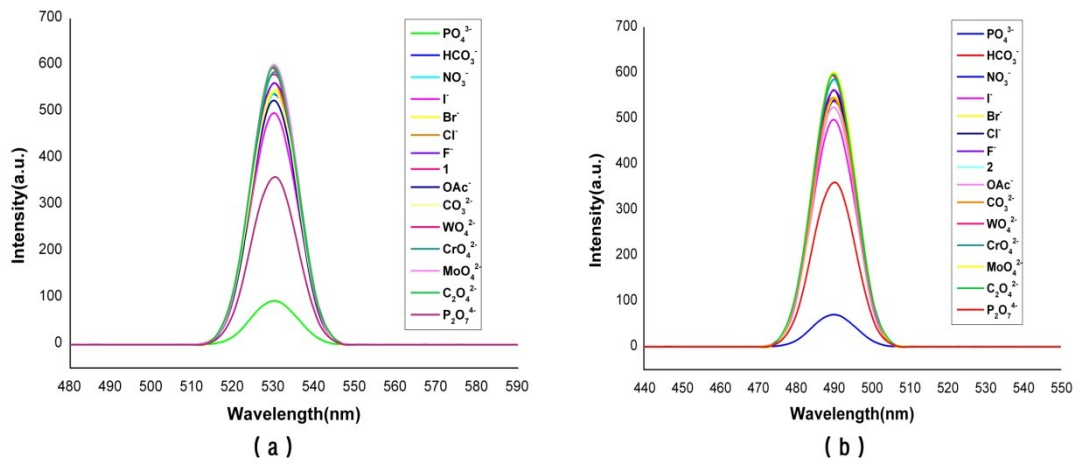

Fig.S5.Comparison of the luminescence intensity of 1-X and 2-X in  $10^{-3}$  M different anions.

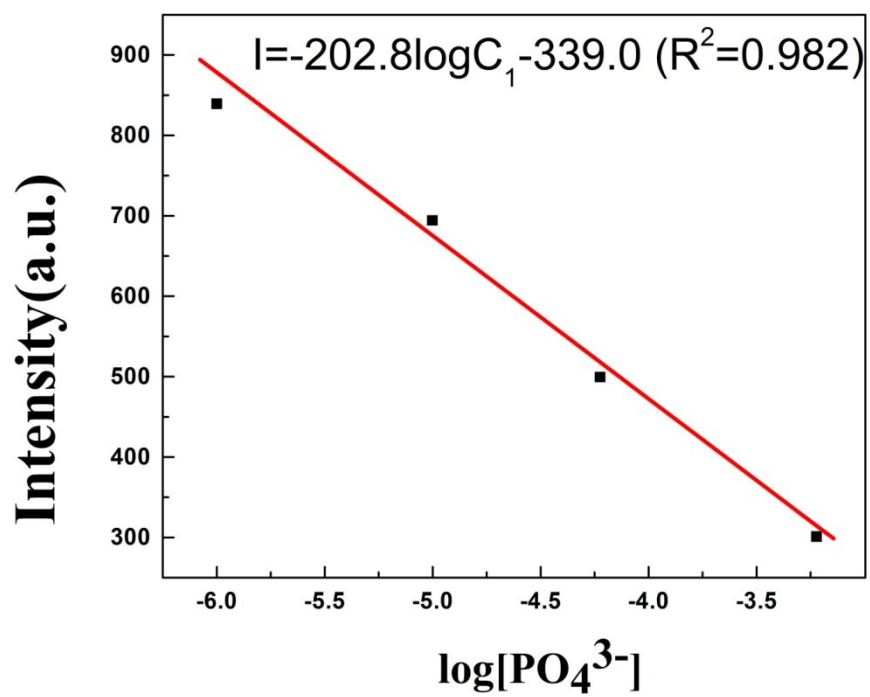

Fig. S6. The intensity plots of **1** vs log [PO<sub>4</sub><sup>3-</sup>]

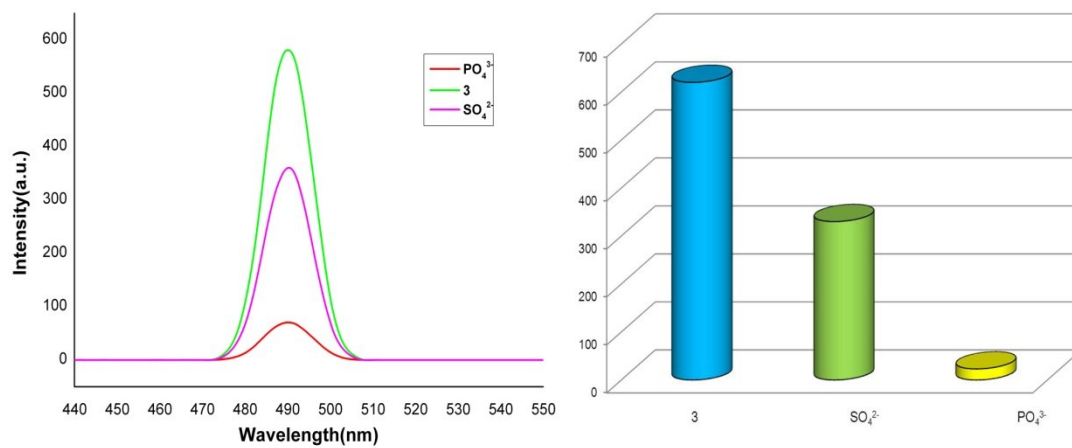

Fig.S7 complex **3** comparison of the luminescence intensity of the  ${}^5\text{D}_4 \rightarrow {}^7\text{F}_5$  transitions (487 nm) of  ${}^3\text{-SO}_4^{2-}$  in  $10^{-3}\text{mol/L}$  anions

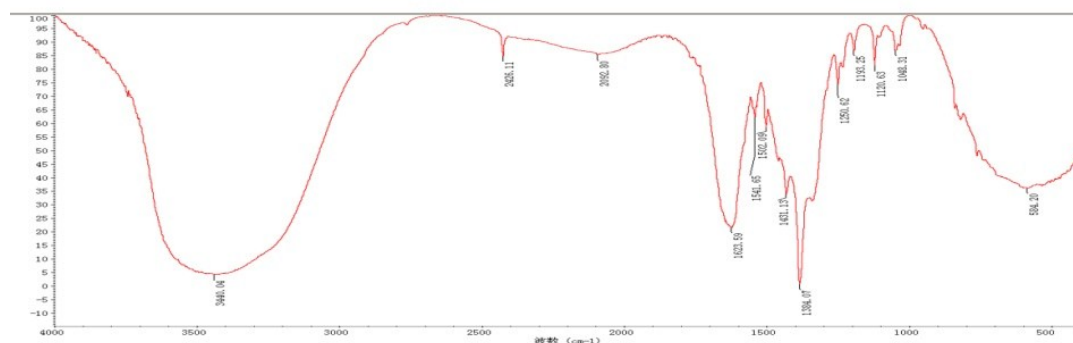

(a)

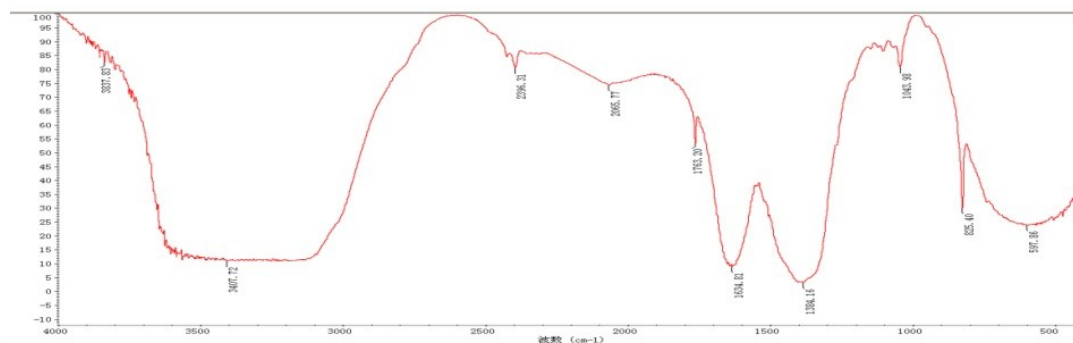

(b)

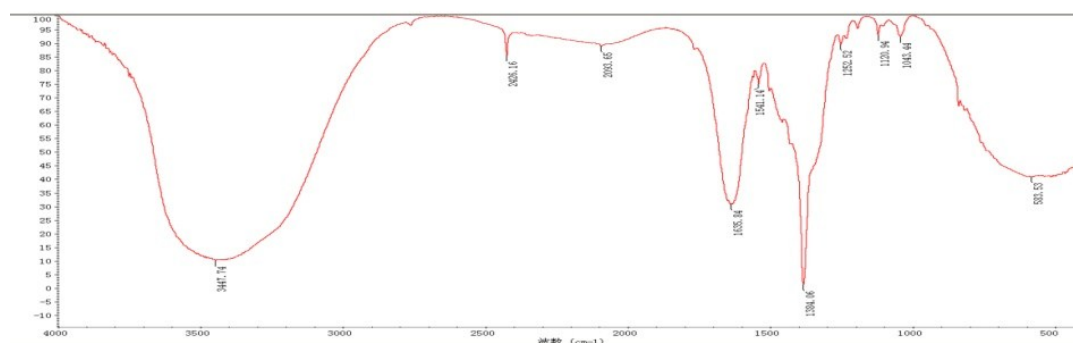

(c)

Fig.S8. Infrared spectrum of complexes 1-3.



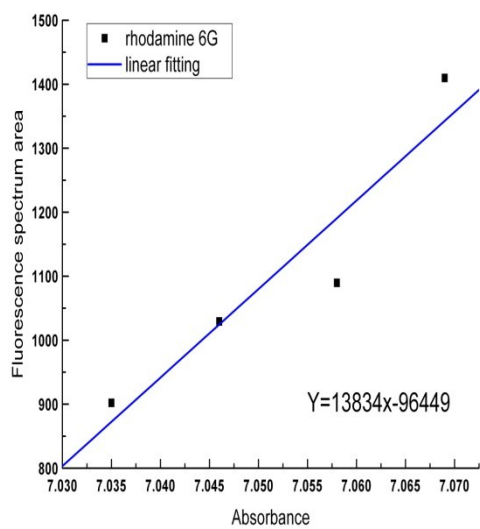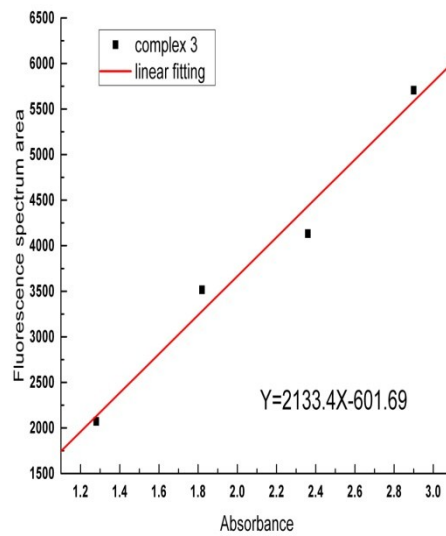

Fig.S9. Absorbance comparative fluorescence spectrum area rhodamine 6G (left) complex 3(right)

Table S1. Crystallographic data and structure refinements summary for 1-3

| Complex                                        | 1                                                  | 2                                                  | 3                                                  |
|------------------------------------------------|----------------------------------------------------|----------------------------------------------------|----------------------------------------------------|
| Empirical Formula                              | C <sub>10</sub> H <sub>12</sub> LaNO <sub>11</sub> | C <sub>10</sub> H <sub>12</sub> CeNO <sub>11</sub> | C <sub>10</sub> H <sub>12</sub> PrNO <sub>11</sub> |
| Formula weight                                 | 461.12                                             | 462.33                                             | 463.12                                             |
| Crystal system, space group                    | Monoclinic , P2(1)/c                               | Monoclinic , P 2(1)/c                              | Monoclinic , P2(1)/c                               |
| a, (Å)                                         | 15.489(6)                                          | 15.4860(7)                                         | 15.489(6)                                          |
| b, (Å)                                         | 6.174(2)                                           | 6.1777(3)                                          | 6.174(2)                                           |
| c, (Å)                                         | 16.745(7)                                          | 16.8851(8)                                         | 16.745(7)                                          |
| α(°)                                           | 90                                                 | 90                                                 | 90                                                 |
| β(°)                                           | 115.294(7)                                         | 115.4770(10)                                       | 115.294(7)                                         |
| γ(°)                                           | 90                                                 | 90                                                 | 90                                                 |
| V, Å <sup>3</sup>                              | 1447.9(10)                                         | 1458.28(12)                                        | 1447.9(10)                                         |
| Z                                              | 4                                                  | 4                                                  | 4                                                  |
| ρ <sub>calcd</sub> , mg/cm <sup>-3</sup>       | 2.115                                              | 2.106                                              | 2.125                                              |
| Absorption coefficient, mm <sup>-1</sup>       | 3.011                                              | 3.182                                              | 3.426                                              |
| Crystal size, mm                               | 0.22 x 0.20 x 0.18                                 | 0.22 x 0.20 x 0.18                                 | 0.22 x 0.20 x 0.18                                 |
| θ Range for data collection                    | 1.45 to 25.40                                      | 1.457 to 27.375                                    | 2.45 to 25.13                                      |
| F(000)                                         | 896                                                | 900                                                | 904                                                |
| Limiting indices                               | -18 ≤ h ≤ 12, -7 ≤ k ≤ 7, -18 ≤ l ≤ 20             | -19 ≤ h ≤ 19, -7 ≤ k ≤ 7, -16 ≤ l ≤ 21             | -18 ≤ h ≤ 13, -7 ≤ k ≤ 7, -19 ≤ l ≤ 19             |
| T                                              | 296(2)                                             | 296(2)                                             | 296(2)                                             |
| Reflections collected/unique                   | 8831/2607[R(int)=0.0192]                           | 8349/1930[R(int)= 0.0435]                          | 6539/2558[R(int)= 0.0492]                          |
| Completeness, %                                | 97.7 %                                             | 99.5                                               | 98.8 %                                             |
| Data/restraints / parameters                   | 2607 / 6 / 220                                     | 3250 / 6 / 222                                     | 2558 / 6 / 220                                     |
| GOF                                            | 1.080                                              | 1.303                                              | 1.089                                              |
| Final R indices (I > 2σ(I))                    | R1 = 0.0154, wR2 = 0.0366                          | R1 = 0.0165, wR2 = 0.0469                          | R1 = 0.0455, wR2 = 0.1119                          |
| R indices (all data)                           | R1 = 0.0163, wR2 = 0.0371                          | R1 = 0.0211, wR2 = 0.0717                          | R1 = 0.0537, wR2 = 0.1163                          |
| Largest diff. peak and hole, e.Å <sup>-3</sup> | 0.524 and -0.317 e.Å <sup>-3</sup>                 | 0.652 and -0.811 e.Å <sup>-3</sup>                 | 1.902 and -1.613 e.Å <sup>-3</sup>                 |

Table S2. Selected bond lengths (Å) and angles (°) of the complex **1-3****1**

|                   |            |                     |            |
|-------------------|------------|---------------------|------------|
| O(12)-La(1)       | 2.7753(18) | O(21)-La(1)         | 2.677(2)   |
| O(14)-La(1)       | 2.4829(19) | C(10)#3-O(16)-La(1) | 132.40(15) |
| O(16)-La(1)       | 2.5250(17) | O(17)-La(1)-O(14)   | 142.46(7)  |
| O(20)-N(1)-La(1)  | 57.69(12)  | O(17)-La(1)-O(16)   | 85.53(6)   |
| O(18)-La(1)       | 2.534(2)   | O(14)-La(1)-O(16)   | 124.00(6)  |
| O(20)-La(1)       | 2.604(2)   | C(10)-O(14)-La(1)   | 129.10(16) |
| O(21)-N(1)-La(1)  | 61.07(12)  | C(6)-O(12)-La(1)    | 121.37(13) |
| C(7)-O(12)-La(1)  | 119.29(13) | O(14)-La(1)-O(15)   | 69.11(7)   |
| O(16)-La(1)-O(18) | 74.47(7)   | O(17)-La(1)-O(18)   | 72.29(8)   |

**2**

|                 |       |                  |       |
|-----------------|-------|------------------|-------|
| O(1)-Ce(1)      | 2.659 | O(2)-Ce(1)       | 2.789 |
| O(3)-Ce(1)      | 2.440 | O(4)-Ce(1)       | 2.518 |
| O(5)-Ce(1)      | 2.509 | O(6)-Ce(1)       | 2.471 |
| O(7)-Ce(1)      | 2.530 | O(8)-Ce(1)       | 2.529 |
| O(9)-Ce(1)      | 2.605 | O(10)-Ce(1)      | 2.689 |
| O(2)-Ce(1)-O(3) | 58.30 | O(9)-Ce(1)-O(10) | 47.82 |

**3**

|                   |            |                   |           |
|-------------------|------------|-------------------|-----------|
| O(18)-Pr(1)       | 2.518(7)   | O(20)-Pr(1)       | 2.569(6)  |
| N(1)-O(20)-Pr(1)  | 99.8(5)    | O(17)-Pr(1)-O(18) | 72.3(2)   |
| O(14)-Pr(1)-O(18) | 132.0(2)   | O(16)-Pr(1)-O(18) | 73.5(2)   |
| O(15)-Pr(1)-O(18) | 139.0(3)   | O(19)-Pr(1)-O(18) | 75.3(2)   |
| O(17)-Pr(1)-O(20) | 147.0(2)   | O(14)-Pr(1)-O(20) | 70.6(2)   |
| O(16)-Pr(1)-O(20) | 69.1(2)    | O(15)-Pr(1)-O(20) | 136.9(3)  |
| O(19)-Pr(1)-O(20) | 115.57(19) | O(18)-Pr(1)-O(20) | 81.6(3)   |
| O(18)-Pr(1)-O(13) | 147.2(2)   | O(20)-Pr(1)-O(13) | 77.2(2)   |
| O(18)-Pr(1)-O(21) | 68.5(2)    | O(20)-Pr(1)-O(21) | 48.05(19) |

#1 -x+1/2,y+1/2,-z+1/2
